# Supplementary material for: Long-term Regional Trends of Nitrogen and Sulfur Deposition in the United States from 2002 to 2017
Source: Copernicus journal article supplement (doi:10.5194/acp-2022-201), 2022-03-24
Supplement: Supplementary file 1 [file acp-2022-201-supplement.pdf]

Supplement of:

## Long-term Regional Trends of Nitrogen and Sulfur Deposition in the United States from 2002 to 2017

Sarah E. Benish et al.

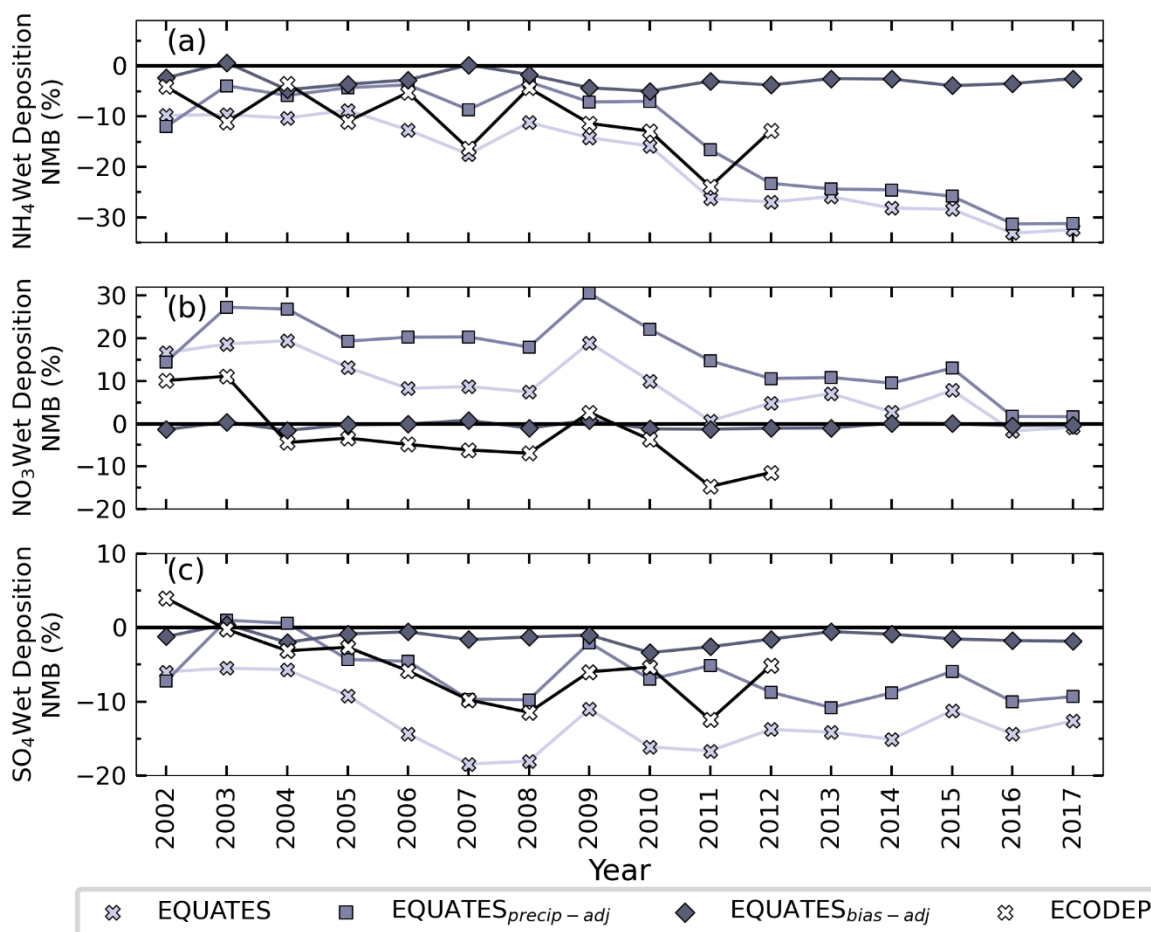

Figure S1. Annual normalized mean bias (NMB, %) for unadjusted, precipitation-adjusted, and bias-adjusted modeled NH<sub>4</sub> (panel a), NO<sub>3</sub> (panel b), and SO<sub>4</sub> (panel c) wet deposition compared to NTN measurements.

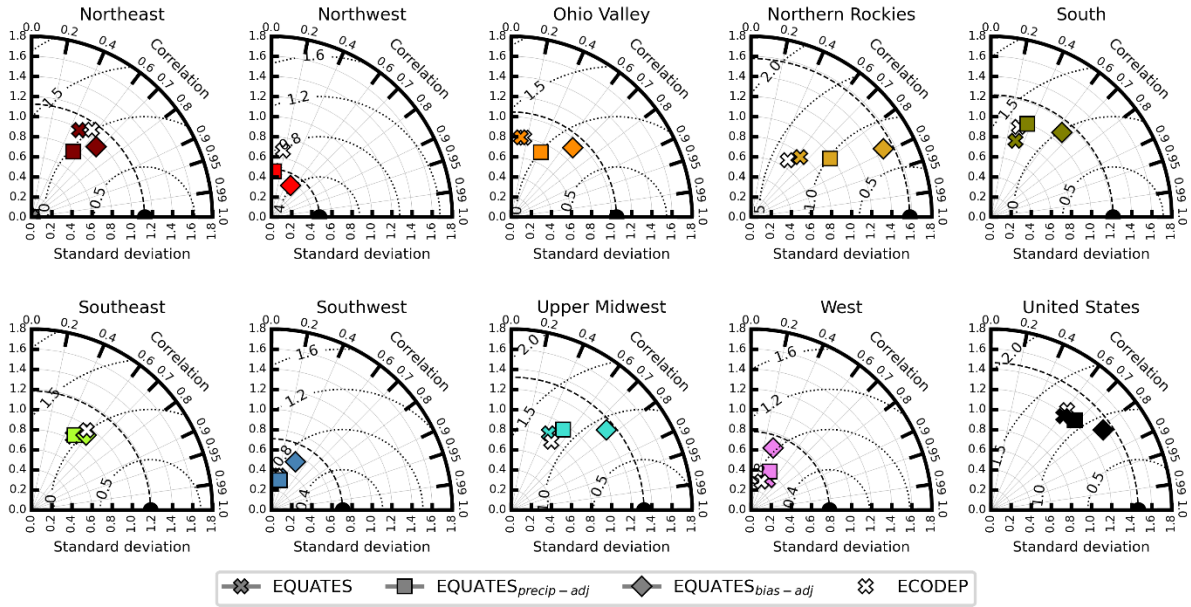

Figure S2. Taylor plot comparing 2002-2017 annual accumulated measured  $\text{NH}_4$  wet deposition ( $\text{kg}/\text{ha}$ ) with EQUATES and ECODEP (2002-2012) model output across climate regions within the CONUS. The symbols show how the unadjusted ( $x$ 's), precipitation-adjusted (squares) and bias-adjusted (diamonds) modeled wet deposition compare to the NTN measurements (black circles).

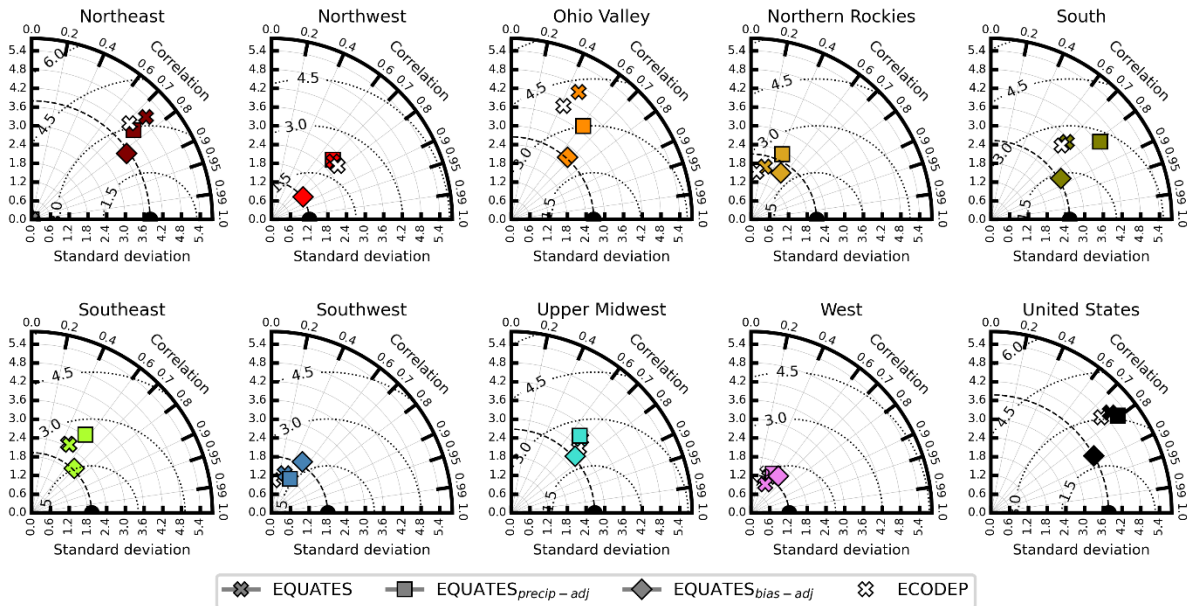

Figure S3. Taylor plot comparing 2002-2017 annual accumulated measured  $\text{NO}_3$  wet deposition ( $\text{kg}/\text{ha}$ ) with EQUATES and ECODEP (2002-2012) model output across climate regions within the CONUS. The symbols show how the unadjusted ( $x$ 's), precipitation-adjusted (squares) and bias-adjusted (diamonds) modeled wet deposition compare to the NTN measurements (black circles).

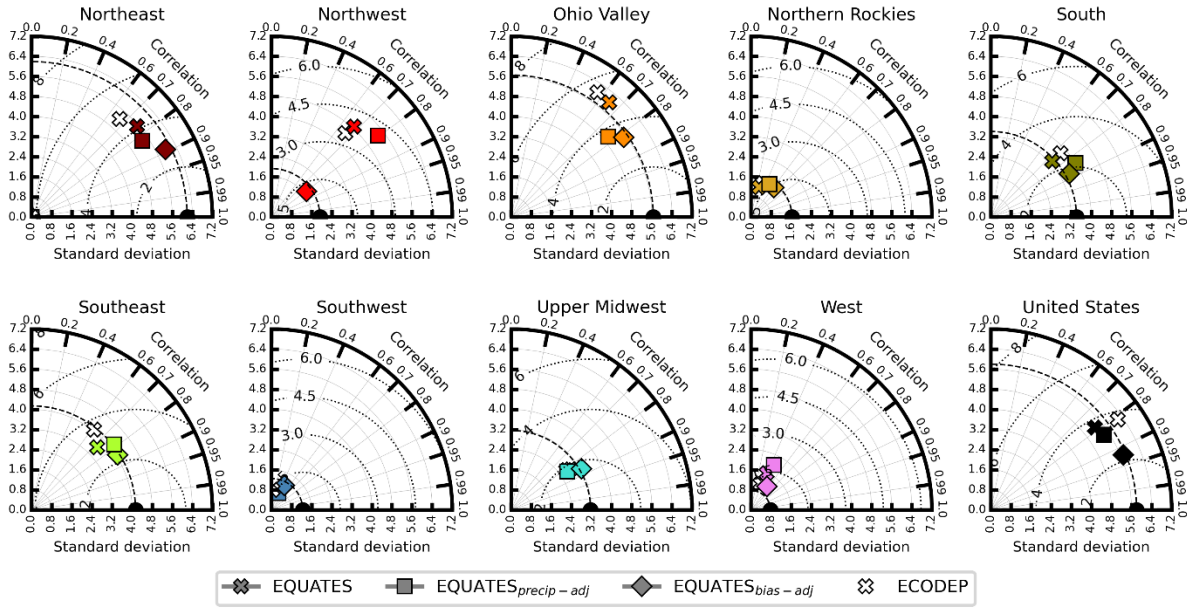

Figure S4. Taylor plot comparing 2002-2017 annual accumulated measured  $\text{SO}_4$  wet deposition ( $\text{kg}/\text{ha}$ ) with EQUATES and ECODEP (2002-2012) model output across climate regions within the CONUS. The symbols show how the unadjusted ( $x$ 's), precipitation-adjusted (squares) and bias-adjusted (diamonds) modeled wet deposition compare to the NTN measurements (black circles).

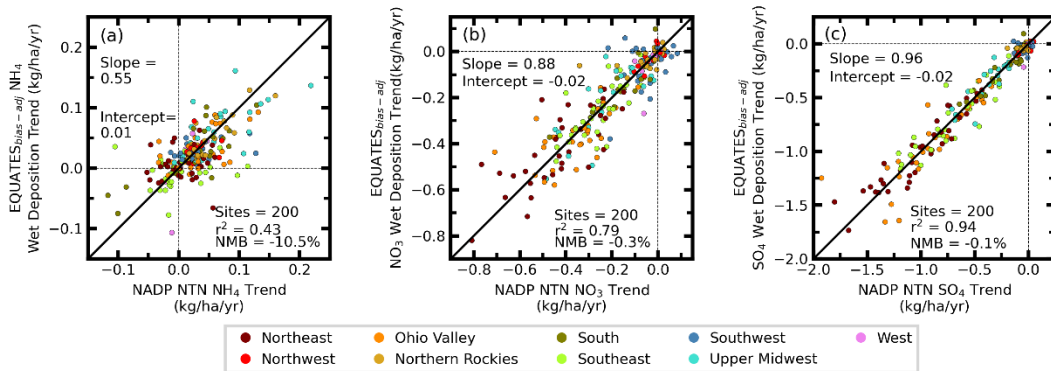

Figure S5. Scatter plot comparing the annual accumulated wet deposition trend ( $\text{kg}/\text{ha}/\text{yr}$ ) from 2002 to 2017 between NTN observations and EQUATES model output for  $\text{NH}_4$  (a),  $\text{NO}_3$  (b), and  $\text{SO}_4$  (c). Each circle denotes a single NTN site, colored by the climate region that meet annual completeness criteria described in the text.

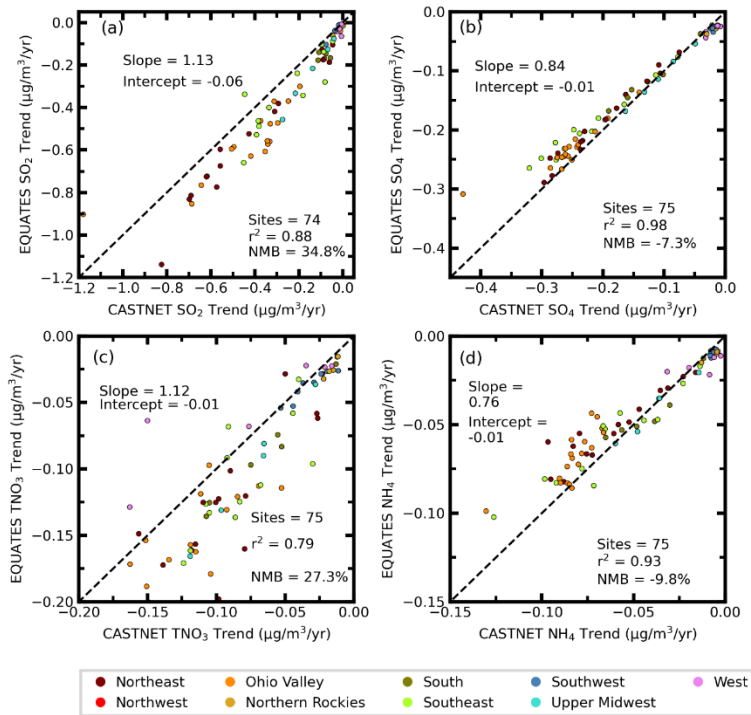

Figure S6. Scatter plot comparing the annual average concentration trend ( $\mu\text{g}/\text{m}^3/\text{yr}$ ) from 2002 to 2017 between CASTNET observations and EQUATES model output of sulfur dioxide (a,  $\text{SO}_2$ ), sulfate (b,  $\text{SO}_4$ ), total oxidized nitrogen (c,  $\text{TNO}_3$ ), and ammonium (d,  $\text{NH}_4$ ). Each circle denotes a single CASTNET site colored by the climate that meet annual completeness criteria.

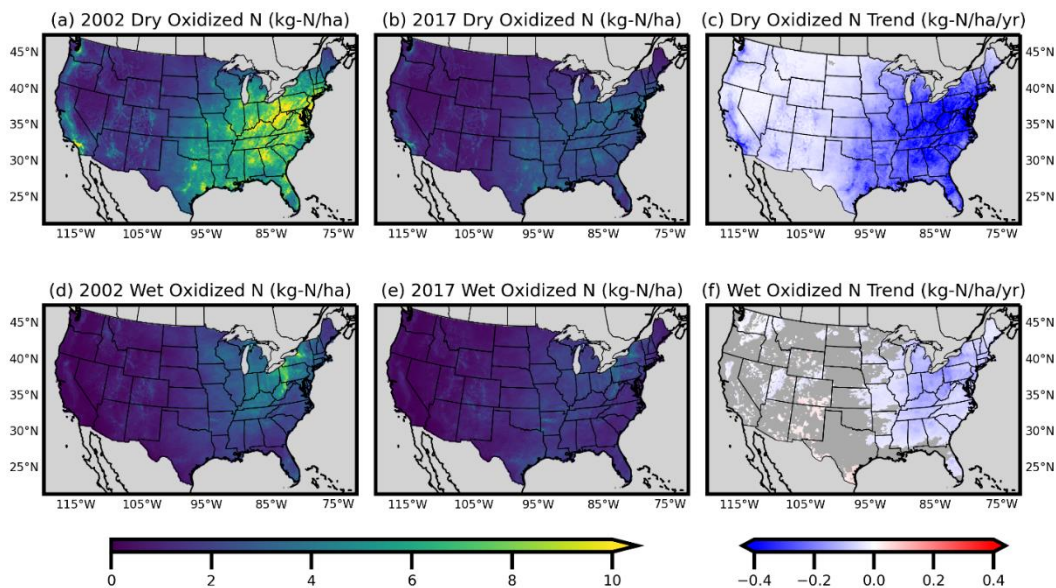

Figure S7. Spatial distribution of dry (top) and wet (bottom) oxidized N deposition in 2002 (a and d,  $\text{kg-N}/\text{ha}$ ), 2017 (b and e,  $\text{kg-N}/\text{ha}$ ), and the 2002-2017 annual trend (c and f,  $\text{kg-N}/\text{ha}/\text{yr}$ ) with significance at the 95% confidence interval. Grey areas in panels (c) and (f) indicate where the trend is unavailable or not significant (i.e.,  $p$ -value of the Wald's test is greater than 0.05).

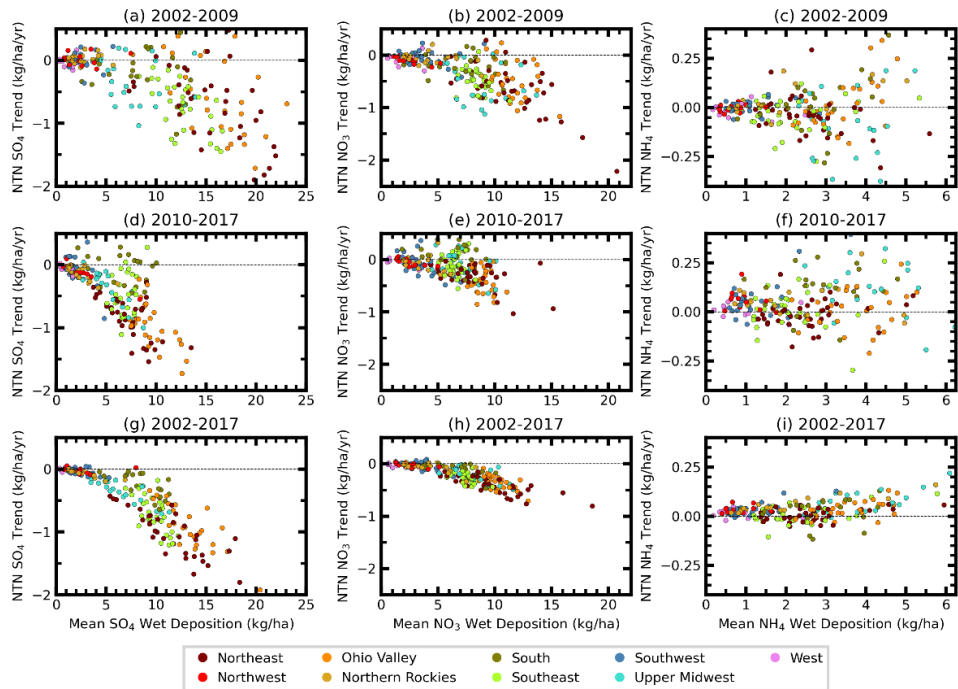

Figure S8. Measured wet deposition trends (kg/ha/yr) of SO<sub>4</sub> (left), NO<sub>3</sub> (middle), and NH<sub>4</sub> (right) as a function of average measured deposition amount from 2002-2009 (top), 2010-2017 (middle), and 2002-2017 (bottom). Each circle is a NTN site colored by the climate region.

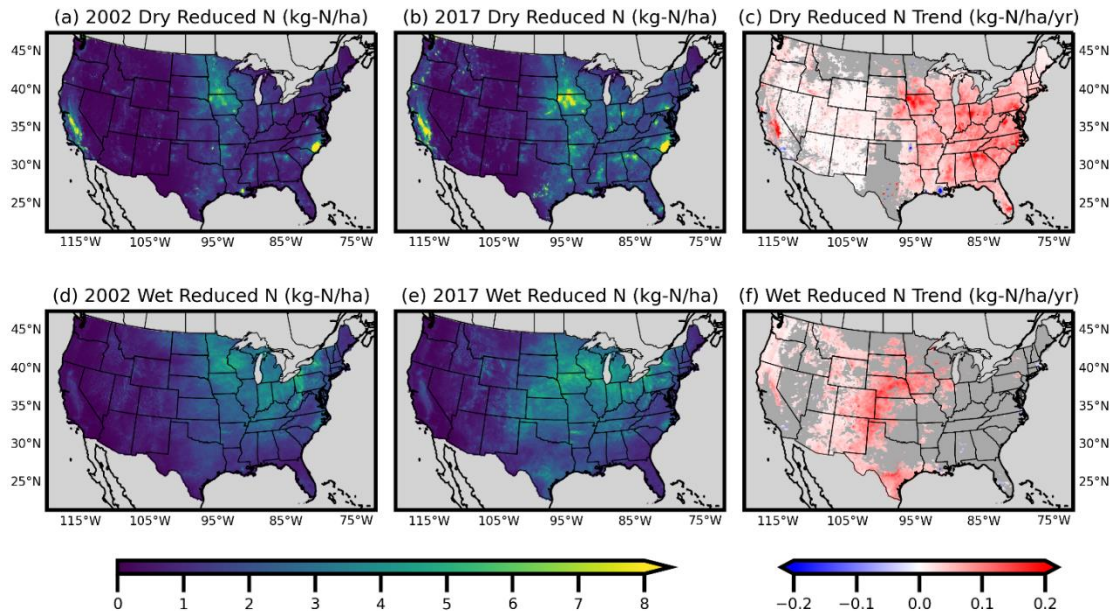

Figure S9. Spatial distribution of dry (top) and wet (bottom) reduced N deposition in 2002 (a and d, kg-N/ha), 2017 (b and e, kg-N/ha), and the 2002-2017 annual trend (c and f, kg-N/ha/yr) with significance at the 95% confidence interval. Grey areas in panels (c) and (f) indicate where the trend is unavailable or not significant (i.e., p-value of the Wald's test is greater than 0.05).

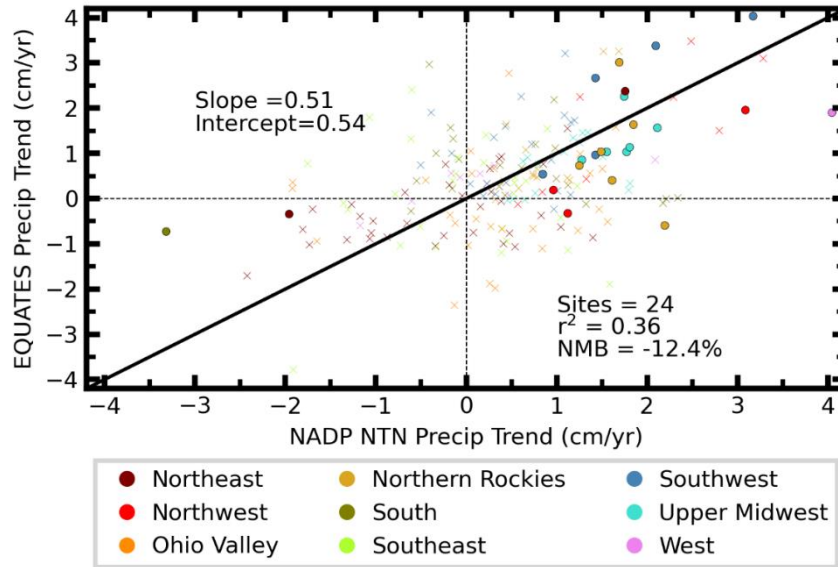

Figure S10. Scatter plot comparing the annual accumulated precipitation trend (cm/yr) from 2002 to 2017 between NTN observations and EQUATES model output. Each marker denotes a single NTN site colored by the climate region that meet annual completeness criteria. Circle markers indicate the observed trend is statistically significant with 95% confidence, while the x's denote insignificant trends. Summary statistics printed on the figure are computed for sites with statistically significant trends.

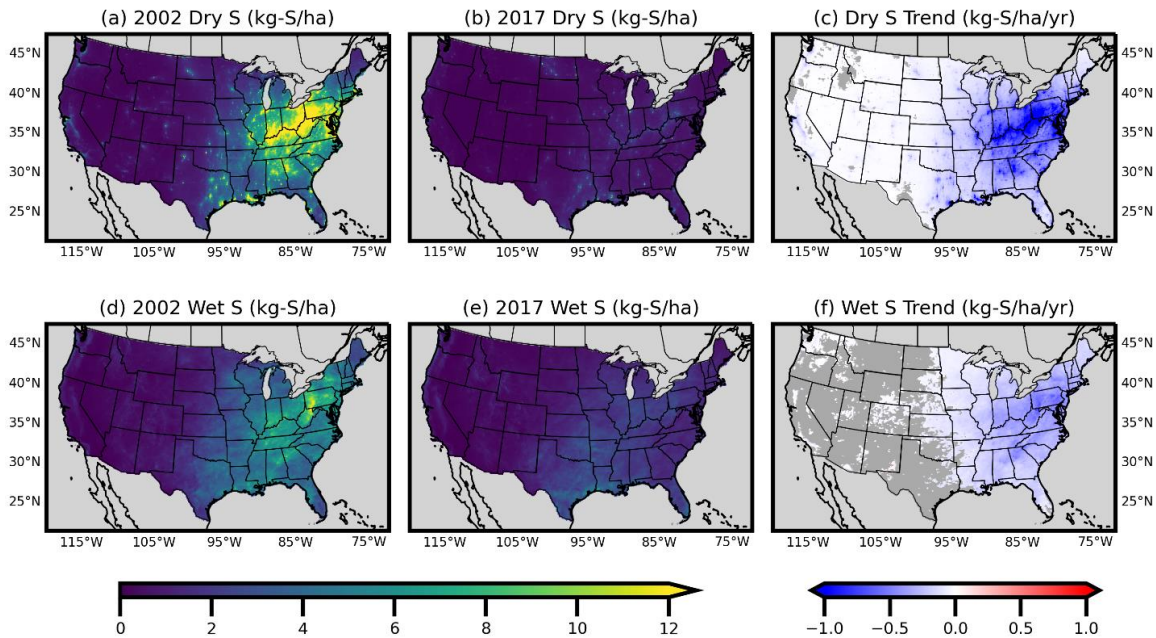

Figure S11. Spatial distribution of dry (top) and wet (bottom) S deposition in 2002 (a and d, kg-S/ha), 2017 (b and e, kg-S/ha), and the 2002-2017 annual trend (c and f, kg-S/ha/yr) with significance at the 95% confidence interval. Grey areas in panels (c) and (f) indicate where the trend is unavailable or not significant (i.e., p-value of the Wald's test is greater than 0.05).

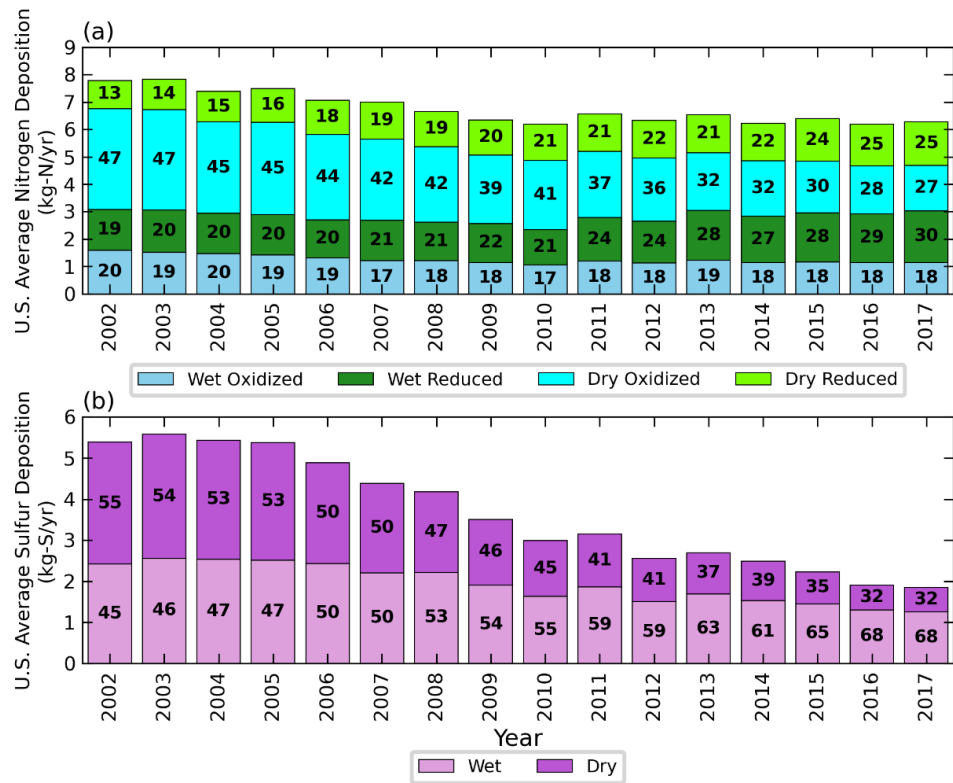

**Figure S12. Annual average total (wet+dry) nitrogen (panel a, kg-N/ha) and sulfur (panel b, kg-S/ha) deposition from 2002 to 2017 across the CONUS. The bold numbers in each bar denote the percentage contribution to the annual total.**

**Table S1. List of NTN site locations assessed in this study with years of valid data and climate region designations.**

| Site ID | Site Name                                     | Latitude | Longitude | Valid Years | NOAA Region |
|---------|-----------------------------------------------|----------|-----------|-------------|-------------|
| AL10    | Black Belt Research and Extension Center      | 32.4583  | -87.2422  | 15          | Southeast   |
| AL99    | Sand Mountain Research and Extension Center   | 34.2886  | -85.9699  | 16          | Southeast   |
| AR02    | Warren 2WSW                                   | 33.605   | -92.0972  | 16          | South       |
| AR03    | Caddo Valley                                  | 34.1795  | -93.0992  | 15          | South       |
| AR16    | Buffalo National River-Buffalo Point          | 36.0842  | -92.5868  | 15          | South       |
| AR27    | Fayetteville                                  | 36.1011  | -94.1737  | 16          | South       |
| AZ03    | Grand Canyon National Park-Hopi Point         | 36.0586  | -112.184  | 16          | Southwest   |
| AZ06    | Organ Pipe Cactus National Monument           | 31.9492  | -112.802  | 16          | Southwest   |
| AZ97    | Petrified Forest National Park-Rainbow Forest | 34.8224  | -109.893  | 14          | Southwest   |
| AZ98    | Chiricahua                                    | 32.0097  | -109.389  | 16          | Southwest   |
| AZ99    | Oliver Knoll                                  | 33.0708  | -109.866  | 14          | Southwest   |
| CA42    | Tanbark Flat                                  | 34.2071  | -117.762  | 15          | West        |
| CA45    | Hopland                                       | 39.0045  | -123.086  | 15          | West        |
| CA66    | Pinnacles National Park-Bear Valley           | 36.4834  | -121.157  | 16          | West        |
| CA67    | Joshua Tree National Park-Black Rock          | 34.0695  | -116.389  | 15          | West        |
| CA76    | Montague                                      | 41.7662  | -122.48   | 16          | West        |
| CA88    | Davis                                         | 38.5357  | -121.776  | 15          | West        |
| CA96    | Lassen Volcanic National Park-Manzanita Lake  | 40.539   | -121.577  | 13          | West        |
| CA99    | Yosemite National Park-Hodgdon Meadow         | 37.7961  | -119.858  | 14          | West        |
| CO00    | Alamosa                                       | 37.4421  | -105.868  | 16          | Southwest   |
| CO01    | Las Animas Fish Hatchery                      | 38.1177  | -103.316  | 16          | Southwest   |
| CO08    | Four Mile Park                                | 39.4025  | -107.345  | 16          | Southwest   |
| CO10    | Gothic                                        | 38.9561  | -106.986  | 16          | Southwest   |
| CO19    | Rocky Meadows National Park-Beaver Meadows    | 40.3639  | -105.581  | 16          | Southwest   |
| CO21    | Manitou                                       | 39.1008  | -105.093  | 16          | Southwest   |
| CO22    | Pawnee                                        | 40.806   | -104.756  | 14          | Southwest   |
| CO91    | Wolf Creek Pass                               | 37.4686  | -106.787  | 15          | Southwest   |
| CO92    | Sunlight Peak                                 | 39.4264  | -107.38   | 15          | Southwest   |
| CO93    | Buffalo Pass-Dry Lake                         | 40.5347  | -106.781  | 16          | Southwest   |
| CO94    | Sugarloaf                                     | 39.9939  | -105.48   | 16          | Southwest   |
| CO96    | Molas Pass                                    | 37.75    | -107.689  | 15          | Southwest   |
| CO97    | Buffalo Pass-Summit Lake                      | 40.5383  | -106.677  | 16          | Southwest   |



|      |                                            |         |          |    |               |
|------|--------------------------------------------|---------|----------|----|---------------|
| CO98 | Rocky Mountain National Park-Loch Vale     | 40.2878 | -105.663 | 13 | Southwest     |
| CO99 | Mesa Verde National Park-Chapin Mesa       | 37.1979 | -108.491 | 16 | Southwest     |
| CT15 | Abington                                   | 41.84   | -72.0101 | 16 | Northeast     |
| FL03 | Bradford Forest                            | 29.9748 | -82.1978 | 14 | Southeast     |
| FL05 | Chassahowitzka National Wildlife Refuge    | 28.7486 | -82.5551 | 16 | Southeast     |
| FL11 | Everglades National Park-Research Center   | 25.39   | -80.68   | 16 | Southeast     |
| FL14 | Quincy                                     | 30.5486 | -84.6004 | 16 | Southeast     |
| FL23 | Sumatra                                    | 30.1106 | -84.9902 | 16 | Southeast     |
| FL41 | Verna Well Field                           | 27.3801 | -82.2831 | 16 | Southeast     |
| FL99 | Kennedy Space Center                       | 28.5428 | -80.644  | 13 | Southeast     |
| GA09 | Okefenokee National Wildlife Refuge        | 30.7404 | -82.1283 | 16 | Southeast     |
| GA20 | Bellville                                  | 32.0849 | -81.9367 | 15 | Southeast     |
| GA33 | Sapelo Island                              | 31.3961 | -81.2811 | 13 | Southeast     |
| GA41 | Georgia Station                            | 33.1805 | -84.4103 | 15 | Southeast     |
| GA99 | Chula                                      | 31.5217 | -83.5482 | 16 | Southeast     |
| IA08 | Big Springs Fish Hatchery                  | 42.9097 | -91.47   | 15 | Upper Midwest |
| IA23 | McNay Research Center                      | 40.9631 | -93.3925 | 16 | Upper Midwest |
| ID02 | Priest River Experimental Forest           | 48.3518 | -116.84  | 15 | Northwest     |
| ID03 | Craters of the Moon National Monument      | 43.4605 | -113.555 | 16 | Northwest     |
| ID11 | Reynolds Creek                             | 43.2049 | -116.75  | 16 | Northwest     |
| IL11 | Bondville                                  | 40.0528 | -88.3719 | 16 | Ohio Valley   |
| IL18 | Shabbona                                   | 41.8414 | -88.8511 | 14 | Ohio Valley   |
| IL46 | Alhambra                                   | 38.8689 | -89.6219 | 16 | Ohio Valley   |
| IL63 | Dixon Springs Agricultural Center          | 37.4356 | -88.6719 | 15 | Ohio Valley   |
| IL78 | Monmouth                                   | 40.9333 | -90.7231 | 16 | Ohio Valley   |
| IN20 | Roush Lake                                 | 40.8401 | -85.4639 | 16 | Ohio Valley   |
| IN22 | Southwest Purdue Agriculture Center        | 38.7408 | -87.4855 | 15 | Ohio Valley   |
| IN34 | Indiana Dunes National Lakeshore           | 41.6318 | -87.0881 | 16 | Ohio Valley   |
| IN41 | Agronomy Center for Research and Extension | 40.4749 | -86.9924 | 16 | Ohio Valley   |
| KS07 | Farlington Fish Hatchery                   | 37.6511 | -94.8036 | 16 | South         |
| KS31 | Konza Prairie                              | 39.1022 | -96.6092 | 16 | South         |
| KS32 | Lake Scott State Park                      | 38.6717 | -100.916 | 16 | South         |
| KY03 | Mackville                                  | 37.7047 | -85.0489 | 16 | Ohio Valley   |
| KY10 | Mammoth Cave National Park-Houchin Meadow  | 37.1317 | -86.148  | 15 | Ohio Valley   |
| KY19 | Cannons Lane                               | 38.2288 | -85.6545 | 13 | Ohio Valley   |

|      |                                              |         |          |    |               |
|------|----------------------------------------------|---------|----------|----|---------------|
| KY22 | Lilley Cornett Woods                         | 37.0778 | -82.9936 | 16 | Ohio Valley   |
| KY35 | Clark State Fish Hatchery                    | 38.1183 | -83.5469 | 14 | Ohio Valley   |
| KY99 | Mulberry Flatt                               | 36.9029 | -88.0121 | 16 | Ohio Valley   |
| LA30 | Southeast Research Station                   | 30.7819 | -90.2021 | 16 | South         |
| MA01 | North Atlantic Coastal Lab                   | 41.9759 | -70.0241 | 15 | Northeast     |
| MA08 | Quabbin Reservoir                            | 42.3925 | -72.3444 | 16 | Northeast     |
| MD13 | Wye                                          | 38.9131 | -76.1525 | 16 | Northeast     |
| MD15 | Smith Island                                 | 37.9925 | -76.0345 | 13 | Northeast     |
| MD18 | Assateague Island National Seashore-Woodcock | 38.251  | -75.1593 | 16 | Northeast     |
| MD99 | Beltsville                                   | 39.028  | -76.8171 | 13 | Northeast     |
| ME00 | Caribou                                      | 46.8675 | -68.0134 | 15 | Northeast     |
| ME02 | Bridgton                                     | 44.1075 | -70.7289 | 16 | Northeast     |
| ME04 | Carrabassett Valley                          | 45.0803 | -70.2118 | 13 | Northeast     |
| ME09 | Greenville Station                           | 45.4891 | -69.6647 | 15 | Northeast     |
| ME96 | Casco Bay-Wolfe's Neck Farm                  | 43.8325 | -70.0645 | 16 | Northeast     |
| ME98 | Acadia National Park-McFarland Hill          | 44.3772 | -68.2608 | 16 | Northeast     |
| MI09 | Douglas Lake                                 | 45.5608 | -84.6783 | 16 | Upper Midwest |
| MI26 | Kellogg Biological Station                   | 42.4103 | -85.3928 | 16 | Upper Midwest |
| MI48 | Seney National Wildlife Refuge-Headquarters  | 46.2889 | -85.9504 | 16 | Upper Midwest |
| MI51 | Unionville                                   | 43.6135 | -83.3599 | 16 | Upper Midwest |
| MI52 | Ann Arbor                                    | 42.4164 | -83.9019 | 16 | Upper Midwest |
| MI53 | Wellston                                     | 44.2242 | -85.8186 | 16 | Upper Midwest |
| MI99 | Chassell                                     | 47.1046 | -88.5516 | 16 | Upper Midwest |
| MN01 | Cedar Creek                                  | 45.4017 | -93.2031 | 16 | Upper Midwest |
| MN08 | Hovland                                      | 47.8471 | -89.965  | 16 | Upper Midwest |
| MN16 | Marcell Experimental Forest                  | 47.5311 | -93.4686 | 16 | Upper Midwest |
| MN18 | Fernberg                                     | 47.9464 | -91.4961 | 15 | Upper Midwest |
| MN23 | Camp Ripley                                  | 46.2494 | -94.4972 | 15 | Upper Midwest |
| MN27 | Lamberton                                    | 44.237  | -95.3011 | 15 | Upper Midwest |
| MN28 | Grindstone Lake                              | 46.1217 | -93.0001 | 16 | Upper Midwest |
| MN32 | Voyageurs National Park-Sullivan Bay         | 48.4132 | -92.8305 | 15 | Upper Midwest |
| MN99 | Wolf Ridge                                   | 47.3841 | -91.2067 | 16 | Upper Midwest |
| MO03 | Ashland Wildlife Area                        | 38.754  | -92.1994 | 15 | Ohio Valley   |
| MO05 | University Forest                            | 36.9108 | -90.3187 | 16 | Ohio Valley   |
| MS10 | Clinton                                      | 32.3069 | -90.3186 | 14 | South         |

|      |                                                 |         |          |    |                  |
|------|-------------------------------------------------|---------|----------|----|------------------|
| MS19 | Newton                                          | 32.3269 | -89.2086 | 15 | South            |
| MS30 | Coffeeville                                     | 34.0025 | -89.7993 | 13 | South            |
| MT00 | Little Bighorn Battlefield National Monument    | 45.5701 | -107.438 | 14 | Northern Rockies |
| MT05 | Glacier National Park-Fire Weather Station      | 48.5102 | -113.997 | 16 | Northern Rockies |
| MT07 | Clancy                                          | 46.485  | -112.065 | 14 | Northern Rockies |
| MT98 | Havre-Northern Agricultural Research Center     | 48.5007 | -109.798 | 15 | Northern Rockies |
| NC03 | Lewiston                                        | 36.1325 | -77.1708 | 16 | Southeast        |
| NC06 | Beaufort                                        | 34.8846 | -76.6207 | 15 | Southeast        |
| NC25 | Coweeta                                         | 35.0605 | -83.4305 | 16 | Southeast        |
| NC29 | Hofmann Forest                                  | 34.825  | -77.3228 | 15 | Southeast        |
| NC34 | Piedmont Research Station                       | 35.697  | -80.6225 | 16 | Southeast        |
| NC35 | Clinton Crops Research Station                  | 35.0258 | -78.2783 | 16 | Southeast        |
| NC36 | Jordan Creek                                    | 34.9705 | -79.5281 | 15 | Southeast        |
| NC41 | Finley Farm                                     | 35.7288 | -78.6802 | 16 | Southeast        |
| ND00 | Theodore Roosevelt National Park-Painted Canyon | 46.8951 | -103.378 | 16 | Northern Rockies |
| ND08 | Icelandic State Park                            | 48.782  | -97.7546 | 13 | Northern Rockies |
| ND11 | Woodworth                                       | 47.1247 | -99.2381 | 15 | Northern Rockies |
| NE15 | Mead                                            | 41.1528 | -96.4912 | 16 | Northern Rockies |
| NE99 | North Platte Agricultural Experiment Station    | 41.0592 | -100.746 | 14 | Northern Rockies |
| NH02 | Hubbard Brook                                   | 43.9433 | -71.7029 | 16 | Northeast        |
| NJ00 | Edwin B. Forsythe National Wildlife Refuge      | 39.4728 | -74.4369 | 15 | Northeast        |
| NJ99 | Washington Crossing                             | 40.3154 | -74.8536 | 16 | Northeast        |
| NM07 | Bandelier National Monument                     | 35.7788 | -106.266 | 16 | Southwest        |
| NM08 | Mayhill                                         | 32.9096 | -105.471 | 14 | Southwest        |
| NV03 | Smith Valley                                    | 38.7992 | -119.257 | 16 | West             |
| NV05 | Great Basin National Park-Lehman Caves          | 39.0054 | -114.217 | 15 | West             |
| NY01 | Alfred                                          | 42.2276 | -77.8016 | 13 | Northeast        |
| NY08 | Aurora Research Farm                            | 42.7339 | -76.6597 | 16 | Northeast        |
| NY10 | Chautauqua                                      | 42.2994 | -79.3964 | 15 | Northeast        |
| NY20 | Huntington Wildlife                             | 43.9731 | -74.2231 | 16 | Northeast        |
| NY22 | Akwesasne Mohawk-Fort Covington                 | 44.9226 | -74.4806 | 15 | Northeast        |
| NY52 | Bennett Bridge                                  | 43.5282 | -75.9492 | 13 | Northeast        |
| NY68 | Biscuit Brook                                   | 41.9936 | -74.5031 | 16 | Northeast        |
| NY96 | Cedar Beach-Southold                            | 41.0347 | -72.3891 | 13 | Northeast        |
| NY98 | Whiteface Mountain                              | 44.3933 | -73.8594 | 16 | Northeast        |

|      |                                                          |         |          |    |                  |
|------|----------------------------------------------------------|---------|----------|----|------------------|
| NY99 | West Point                                               | 41.3511 | -74.0484 | 16 | Northeast        |
| OH09 | Oxford                                                   | 39.5309 | -84.7238 | 16 | Ohio Valley      |
| OH17 | Delaware                                                 | 40.3555 | -83.0661 | 16 | Ohio Valley      |
| OH49 | Caldwell                                                 | 39.7928 | -81.5311 | 16 | Ohio Valley      |
| OH54 | Deer Creek State Park                                    | 39.6359 | -83.2606 | 16 | Ohio Valley      |
| OH71 | Wooster                                                  | 40.7813 | -81.9197 | 16 | Ohio Valley      |
| OK00 | Salt Northern Rockies National Wildlife Refuge           | 36.7863 | -98.18   | 16 | South            |
| OK17 | Kessler Farm Field Laboratory                            | 34.98   | -97.5214 | 15 | South            |
| OK29 | Goodwell Research Station                                | 36.5908 | -101.618 | 16 | South            |
| OR10 | H. J. Andrews Experimental Forest                        | 44.2118 | -122.256 | 16 | Northwest        |
| OR18 | Starkey Experimental Forest                              | 45.2247 | -118.513 | 16 | Northwest        |
| OR97 | Hyslop Farm                                              | 44.6347 | -123.19  | 16 | Northwest        |
| PA00 | Arendtsville                                             | 39.9231 | -77.3078 | 16 | Northeast        |
| PA15 | Penn State                                               | 40.7883 | -77.9458 | 16 | Northeast        |
| PA18 | Young Woman's Creek                                      | 41.4142 | -77.6799 | 16 | Northeast        |
| PA29 | Kane Experimental Forest                                 | 41.5978 | -78.7675 | 16 | Northeast        |
| PA42 | Leading Ridge                                            | 40.6575 | -77.9397 | 16 | Northeast        |
| PA47 | Millersville                                             | 39.9909 | -76.3856 | 14 | Northeast        |
| PA72 | Milford                                                  | 41.3273 | -74.8199 | 13 | Northeast        |
| SC05 | Cape Romain National Wildlife Refuge                     | 32.943  | -79.6592 | 16 | Southeast        |
| SC06 | Santee National Wildlife Refuge                          | 33.5394 | -80.435  | 15 | Southeast        |
| SD04 | Wind Cave National Park-Elk Mountain                     | 43.5577 | -103.484 | 14 | Northern Rockies |
| SD08 | Cottonwood                                               | 43.9461 | -101.855 | 15 | Northern Rockies |
| SD99 | Huron Well Field                                         | 44.355  | -98.2917 | 16 | Northern Rockies |
| TN04 | Speedwell                                                | 36.4698 | -83.8272 | 16 | Ohio Valley      |
| TN11 | Great Smoky Mountains National Park-Elkmount             | 35.6645 | -83.5903 | 16 | Ohio Valley      |
| TN14 | Hatchie National Wildlife Refuge                         | 35.4688 | -89.1713 | 14 | Ohio Valley      |
| TX03 | Beeville                                                 | 28.4667 | -97.7069 | 16 | South            |
| TX04 | Big Bend National Park-K-Bar                             | 29.3025 | -103.178 | 15 | South            |
| TX10 | Attwater Prairie Chicken National Wildlife Refuge        | 29.6614 | -96.2594 | 14 | South            |
| TX16 | Sonora                                                   | 30.2613 | -100.555 | 16 | South            |
| TX21 | Longview                                                 | 32.3786 | -94.7117 | 16 | South            |
| TX22 | Guadalupe Mountains National Park Frijole Ranger Station | 31.9069 | -104.805 | 15 | South            |
| TX56 | L.B.J. National Grasslands                               | 33.3917 | -97.6397 | 16 | South            |
| UT01 | Logan                                                    | 41.6661 | -111.891 | 15 | Southwest        |

|      |                                                         |         |          |    |                  |
|------|---------------------------------------------------------|---------|----------|----|------------------|
| UT09 | Canyonlands National Park-Island in the Sky             | 38.4584 | -109.821 | 15 | Southwest        |
| UT98 | Green River                                             | 39.0001 | -110.174 | 16 | Southwest        |
| UT99 | Bryce Canyon National Park-Repeater Hill                | 37.6186 | -112.173 | 16 | Southwest        |
| VA00 | Charlottesville                                         | 38.0402 | -78.5427 | 16 | Southeast        |
| VA13 | Hortons Station                                         | 37.3232 | -80.4572 | 16 | Southeast        |
| VA24 | Prince Edward                                           | 37.1652 | -78.3073 | 16 | Southeast        |
| VA28 | Shenandoah National Park-Big Meadows                    | 38.5231 | -78.4348 | 15 | Southeast        |
| VA99 | Natural Bridge Station                                  | 37.6265 | -79.5126 | 15 | Southeast        |
| VT01 | Bennington                                              | 42.8761 | -73.1633 | 16 | Northeast        |
| VT99 | Underhill                                               | 44.5283 | -72.8684 | 16 | Northeast        |
| WA14 | Olympic National Park-Hoh Ranger Station                | 47.8597 | -123.933 | 14 | Northwest        |
| WA19 | North Cascades National Park-Marblemount Ranger Station | 48.5403 | -121.446 | 16 | Northwest        |
| WA21 | La Grande                                               | 46.8353 | -122.287 | 14 | Northwest        |
| WA24 | Palouse Conservation Farm                               | 46.7606 | -117.185 | 16 | Northwest        |
| WA98 | Columbia River Gorge                                    | 45.5694 | -122.21  | 14 | Northwest        |
| WA99 | Mount Rainier National Park-Tahoma Woods                | 46.7582 | -122.124 | 15 | Northwest        |
| WI35 | Perkinstown                                             | 45.2064 | -90.5978 | 16 | Upper Midwest    |
| WI36 | Trout Lake                                              | 46.0512 | -89.6541 | 16 | Upper Midwest    |
| WI37 | Spooner                                                 | 45.8228 | -91.8744 | 15 | Upper Midwest    |
| WV05 | Cedar Creek State Park                                  | 38.8794 | -80.8476 | 15 | Ohio Valley      |
| WV18 | Parsons                                                 | 39.0897 | -79.6622 | 16 | Ohio Valley      |
| WY00 | Snowy Range                                             | 41.3762 | -106.26  | 16 | Northern Rockies |
| WY02 | Sinks Canyon                                            | 42.7336 | -108.85  | 16 | Northern Rockies |
| WY06 | Pinedale                                                | 42.929  | -109.788 | 13 | Northern Rockies |
| WY08 | Yellowstone National Park-Tower Falls                   | 44.9166 | -110.42  | 16 | Northern Rockies |
| WY95 | Brooklyn Lake                                           | 41.3647 | -106.241 | 16 | Northern Rockies |
| WY98 | Gypsum Creek                                            | 43.2227 | -109.992 | 13 | Northern Rockies |
| WY99 | Newcastle                                               | 43.873  | -104.192 | 16 | Northern Rockies |

**Table S2. Location of CASTNET sites assessed in this study with years of valid data and climate region designations.**

| Site ID | Latitude | Longitude | NOAA Region      | Valid Years |
|---------|----------|-----------|------------------|-------------|
| ABT147  | 41.8405  | -72.0104  | Northeast        | 16          |
| ACA416  | 44.3771  | -68.2608  | Northeast        | 16          |
| ALC188  | 30.7016  | -94.674   | South            | 14          |
| ALH157  | 38.869   | -89.6228  | Ohio Valley      | 16          |
| ANA115  | 42.4166  | -83.9022  | Upper Midwest    | 16          |
| ARE128  | 39.9232  | -77.3079  | Northeast        | 16          |
| ASH135  | 46.6038  | -68.4132  | Northeast        | 16          |
| BBE401  | 29.3027  | -103.178  | South            | 16          |
| BEL116  | 39.0282  | -76.8171  | Northeast        | 15          |
| BFT142  | 34.8847  | -76.6207  | Southeast        | 16          |
| BVL130  | 40.052   | -88.3725  | Ohio Valley      | 16          |
| BWR139  | 38.445   | -76.1113  | Northeast        | 16          |
| CAD150  | 34.1793  | -93.0988  | South            | 16          |
| CAN407  | 38.4583  | -109.821  | Southwest        | 16          |
| CAT175  | 41.9423  | -74.552   | Northeast        | 16          |
| CDR119  | 38.8795  | -80.8477  | Ohio Valley      | 16          |
| CDZ171  | 36.7841  | -87.8502  | Ohio Valley      | 16          |
| CHA467  | 32.0094  | -109.389  | Southwest        | 16          |
| CHE185  | 35.7508  | -94.6698  | South            | 16          |
| CKT136  | 37.9215  | -83.0663  | Ohio Valley      | 16          |
| CND125  | 35.2633  | -79.8375  | Southeast        | 16          |
| CNT169  | 41.3645  | -106.24   | Northern Rockies | 16          |
| COW137  | 35.0605  | -83.4303  | Southeast        | 16          |
| CTH110  | 42.4009  | -76.6535  | Northeast        | 16          |
| CVL151  | 34.0027  | -89.7992  | South            | 16          |
| DCP114  | 39.6359  | -83.2606  | Ohio Valley      | 16          |
| ESP127  | 36.0389  | -85.733   | Ohio Valley      | 16          |
| EVE419  | 25.3912  | -80.6808  | Southeast        | 15          |
| GAS153  | 33.1812  | -84.4101  | Southeast        | 16          |
| GLR468  | 48.5103  | -113.997  | Northern Rockies | 16          |
| GRB411  | 39.0051  | -114.216  | West             | 15          |
| GRC474  | 36.0586  | -112.184  | Southwest        | 16          |
| GRS420  | 35.6335  | -83.9416  | Ohio Valley      | 15          |
| GTH161  | 38.9563  | -106.986  | Southwest        | 16          |
| HOX148  | 44.1809  | -85.739   | Upper Midwest    | 15          |
| HWF187  | 43.973   | -74.2233  | Northeast        | 16          |
| IRL141  | 27.8492  | -80.4556  | Southeast        | 15          |
| JOT403  | 34.0696  | -116.389  | West             | 16          |
| KEF112  | 41.5981  | -78.7679  | Northeast        | 15          |
| KNZ184  | 39.1022  | -96.6096  | South            | 16          |

|        |         |          |                  |    |
|--------|---------|----------|------------------|----|
| LAV410 | 40.54   | -121.577 | West             | 16 |
| LRL117 | 39.9883 | -79.2516 | Northeast        | 16 |
| MAC426 | 37.1318 | -86.143  | Ohio Valley      | 16 |
| MCK131 | 37.7047 | -85.0487 | Ohio Valley      | 15 |
| MCK231 | 37.7047 | -85.0487 | Ohio Valley      | 16 |
| MEV405 | 37.1984 | -108.491 | Southwest        | 14 |
| MKG113 | 41.4268 | -80.1452 | Northeast        | 16 |
| OXF122 | 39.5311 | -84.7235 | Ohio Valley      | 16 |
| PAR107 | 39.0904 | -79.6617 | Ohio Valley      | 16 |
| PED108 | 37.1652 | -78.3071 | Southeast        | 13 |
| PET427 | 34.8225 | -109.893 | Southwest        | 16 |
| PIN414 | 36.4832 | -121.157 | West             | 16 |
| PND165 | 42.929  | -109.788 | Northern Rockies | 16 |
| PNF126 | 36.1054 | -82.045  | Southeast        | 16 |
| PRK134 | 45.2065 | -90.5972 | Upper Midwest    | 15 |
| PSU106 | 40.7209 | -77.9318 | Northeast        | 16 |
| QAK172 | 39.9427 | -81.3379 | Ohio Valley      | 16 |
| ROM206 | 40.2781 | -105.546 | Southwest        | 16 |
| ROM406 | 40.2781 | -105.546 | Southwest        | 16 |
| SAL133 | 40.816  | -85.6614 | Ohio Valley      | 15 |
| SEK430 | 36.4895 | -118.829 | West             | 13 |
| SHN418 | 38.5231 | -78.4347 | Southeast        | 15 |
| SND152 | 34.289  | -85.9701 | Southeast        | 15 |
| SPD111 | 36.4698 | -83.8265 | Ohio Valley      | 15 |
| STK138 | 42.2872 | -89.9999 | Ohio Valley      | 16 |
| SUM156 | 30.1102 | -84.9904 | Southeast        | 16 |
| THR422 | 46.8948 | -103.378 | Northern Rockies | 15 |
| UVL124 | 43.6136 | -83.3599 | Upper Midwest    | 16 |
| VIN140 | 38.7408 | -87.4849 | Ohio Valley      | 16 |
| VOY413 | 48.4125 | -92.8292 | Upper Midwest    | 16 |
| VPI120 | 37.3232 | -80.4572 | Southeast        | 16 |
| WSP144 | 40.3123 | -74.8727 | Northeast        | 16 |
| WST109 | 43.9445 | -71.7008 | Northeast        | 15 |
| YEL408 | 44.5654 | -110.4   | Northern Rockies | 16 |
| YOS404 | 37.7132 | -119.706 | West             | 16 |
